# Supplementary material
Source: PubMed Central journal article supplement (PMC10369154)
Supplement: sj-pdf-4-jcb-10.1177_0271678X231165653.pdf [file sj-pdf-4-jcb-10.1177_0271678X231165653.pdf]

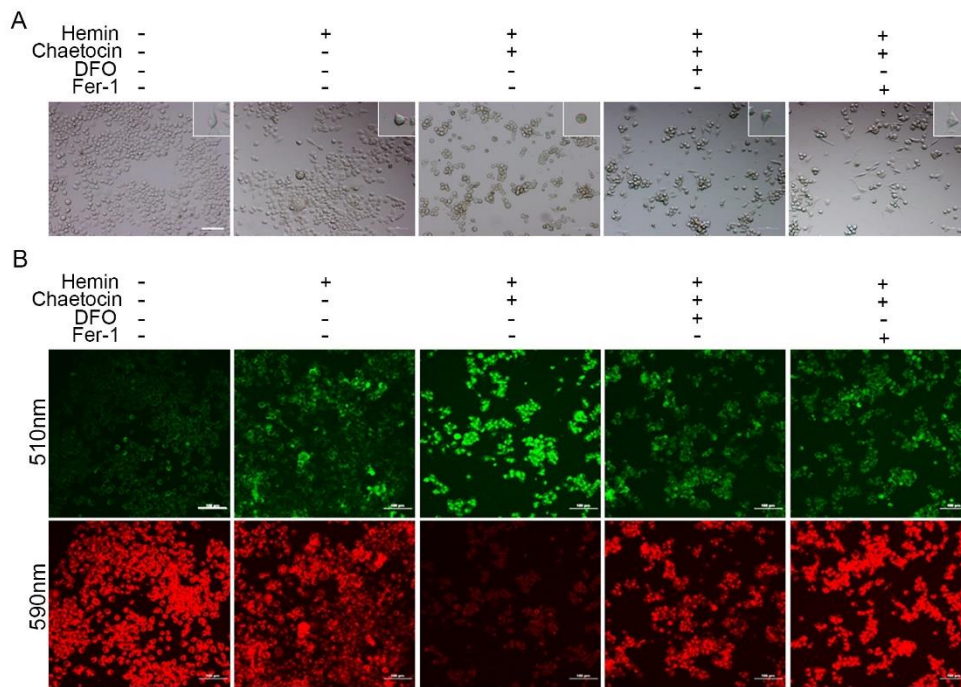

**Figure S1. Suv39h1 inhibition aggravated hemin-induced ferroptosis in N2A cells.** (A) N2A cells were treated with Hemin, chaetocin, DFO and Fer-1 as indicated. The images show brightfield of cells under different treatments. (B) Lipid ROS that were assessed using BODIPY 581/591 C11 dye. Scale bar: 100  $\mu$ m.

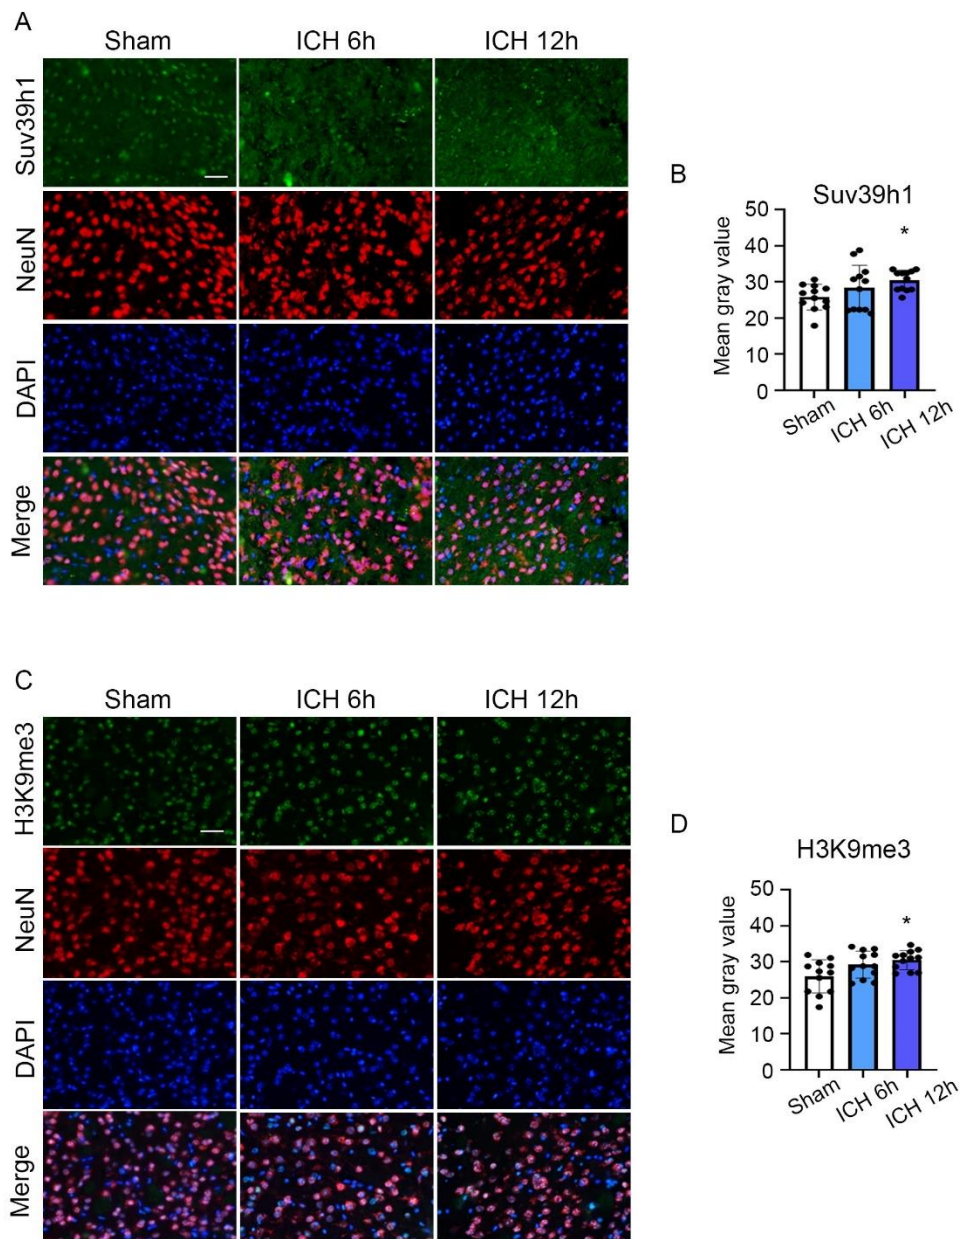

**Figure S2. Alterations of Suv39h1 and H3K9me3 in ICH mice tissues at early stages.** (A) Brain slices obtained at 6 and 12 hours post ICH were stained with anti-Suv39h1, NeuN and DAPI. (B) The mean fluorescence intensity of Suv39h1 in (A) was quantified. (C) Brain slices obtained at 6 and 12 hours post ICH were stained with anti-H3K9me3, NeuN and DAPI. (D) The mean fluorescence intensity of H3K9me3 in (C) was quantified. Results are shown as scatter plots (Mean±SD). n=12 images from 3 mice. Kruskal-Wallis test (B) or one-way ANOVA (D) followed by Tukey's or Dunn's multiple comparisons tests were employed. \* $p < 0.05$  vs Sham. Scale bar: (A, C) 75  $\mu$ m.

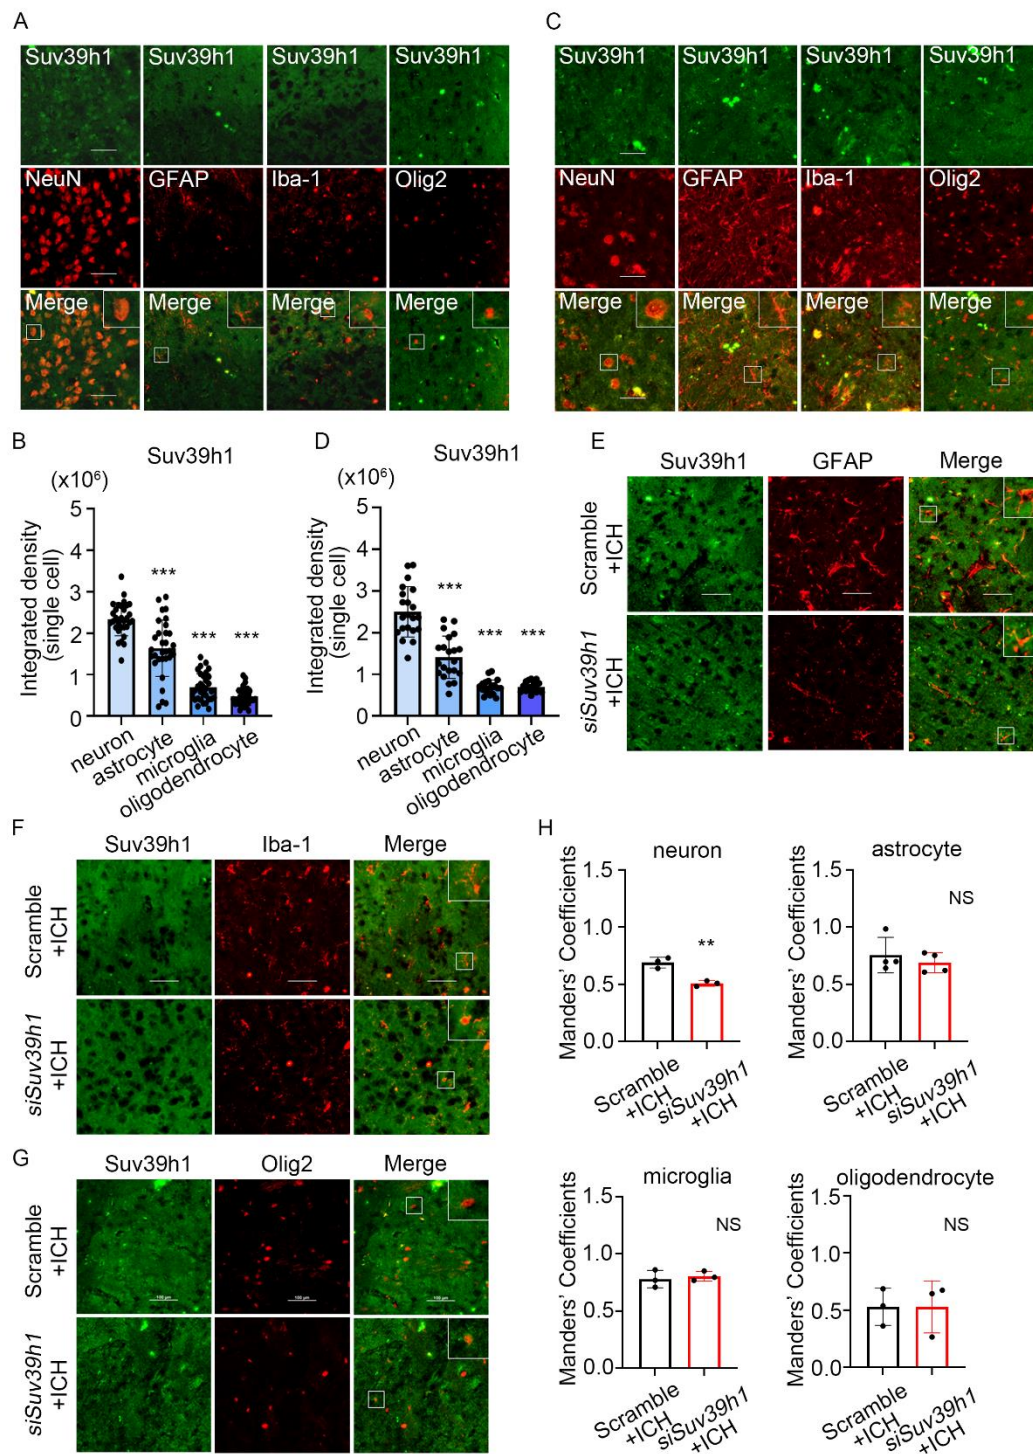

**Figure S3. Expression alterations of Suv39h1 in different cell types.** (A, B) Brain slices obtained at 3d post sham surgery were stained with anti-Suv39h1, NeuN, GFAP, Iba1 and Olig2 (A). The fluorescence intensity of Suv39h1 of NeuN<sup>+</sup>, GFAP<sup>+</sup>, Iba1<sup>+</sup> or Olig2<sup>+</sup> cells was quantified (B). (C, D) Brain slices obtained at 3d post ICH were stained with anti-Suv39h1, NeuN, GFAP, Iba1 and Olig2 (C). The fluorescence intensity of Suv39h1 of NeuN<sup>+</sup>, GFAP<sup>+</sup>, Iba1<sup>+</sup> or Olig2<sup>+</sup> cells was quantified (D). (E-

**G**) Immunostaining was performed using Suv39h1 and GFAP (E), Iba1 (F), or Olig2 (G) antibody at day 3 post ICH. **H**) The Manders' Colocalization Coefficients (M1) between Suv39h1 and NeuN, GFAP, Iba1 or Olig2 were calculated. Results are shown as scatter plots (Mean±SD). n=31 cells (B), n=21 cells (D), n=3-4 images (H). One-way ANOVA followed by Tukey's or Dunn's multiple comparisons tests in (B, D) or two-tailed *t* test in (H) were employed. \*\*  $p < 0.01$  vs Scramble+ICH, \*\*\* $p < 0.001$  vs neuron; NS, not significant. Scale bar: (A, C, E-G) 100  $\mu\text{m}$ .
